# Supplementary material for: Highly efficient BiVO4 single-crystal photocatalyst with selective Ag2O-Ag modification: orientation transport, rapid interfacial transfer and catalytic reaction
Source: Royal Society of Chemistry journal article supplement (doi:10.1039/c8dt00780b), 2018-01-01
Supplement: c8dt00780b1.pdf [file c8dt00780b1.pdf]

Support information

**Highly efficient BiVO<sub>4</sub> single-crystal photocatalyst with selective  
Ag<sub>2</sub>O-Ag modification: orientation transport, rapid interfacial  
transfer and catalytic reaction**

Xuefei Wang<sup>a</sup>, Dan Liao<sup>a</sup>, Huogen Yu<sup>\*a,b</sup>, Jianguo Yu<sup>c</sup>

<sup>a</sup> Department of Chemistry, School of Chemistry, Chemical Engineering and Life Sciences, Wuhan University of Technology, Wuhan 430070, People's Republic of China

<sup>b</sup> State Key Laboratory of Silicate Materials for Architectures, Wuhan University of Technology, Wuhan 430070, People's Republic of China

<sup>c</sup> State Key Laboratory of Advanced Technology for Material Synthesis and Processing, Wuhan University of Technology, Wuhan 430070, People's Republic of China

Tel: 0086-27-87756662, Fax: 0086-27-87879468

E-mail: yuhuogen@whut.edu.cn (H.Yu)

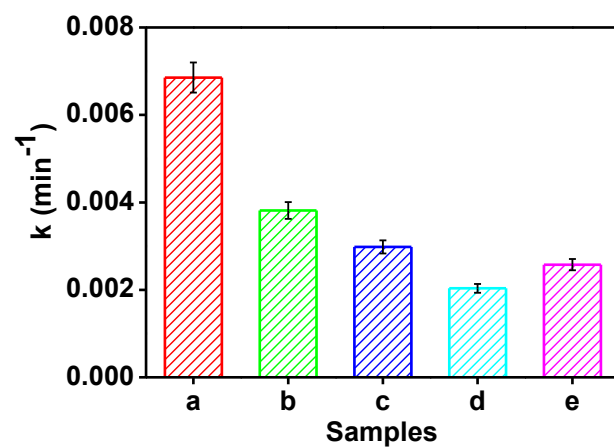

**Fig. S1.** The rate constant ( $k$ ) of MO decomposition by  $\text{Ag}_2\text{O-Ag/BiVO}_4$  photocatalysts obtained by heating up to  $300\text{ }^\circ\text{C}$  and keeping for different time in the air: (a) 0 h, (b) 1/6 h, (c) 1 h, (d) 3 h, and (e) 6 h.

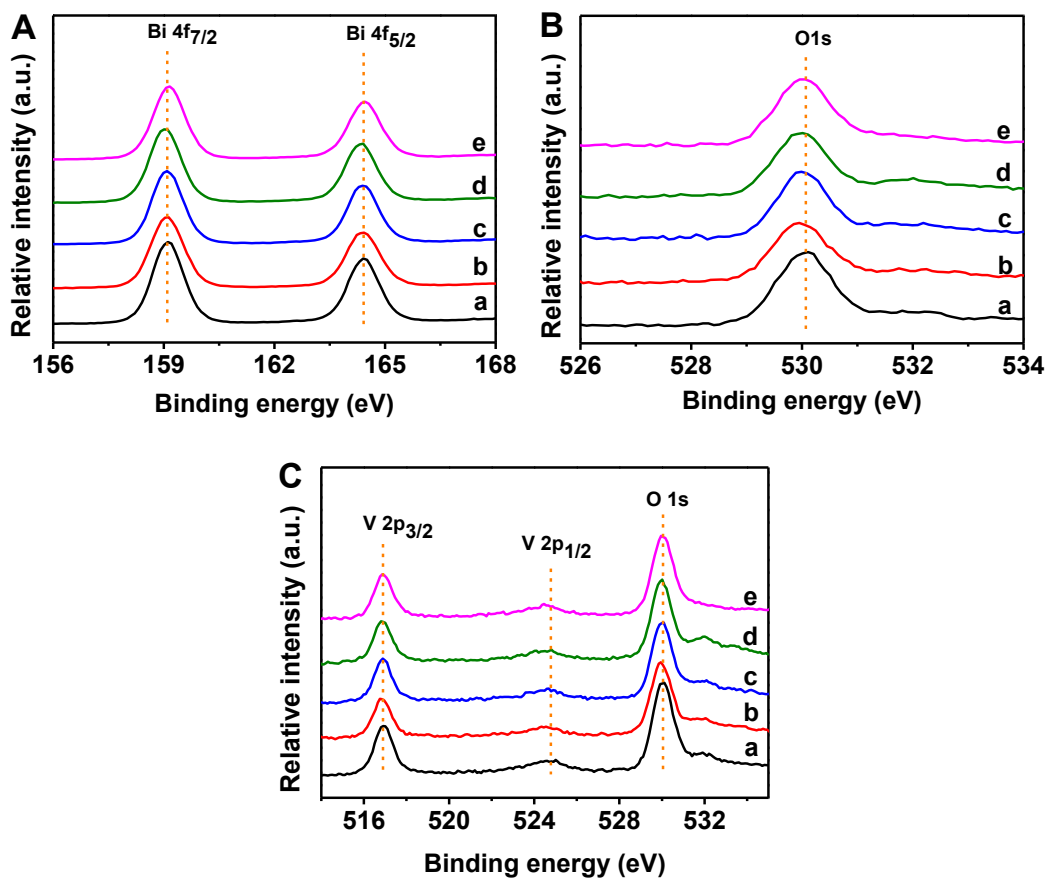

**Fig. S2.** The high-resolution XPS spectra of (A) Bi 4f, (B) O 1s and (C) V 2p for various samples: (a) BiVO<sub>4</sub>, (b) Ag/BiVO<sub>4</sub>, (c) Ag<sub>2</sub>O-Ag/BiVO<sub>4</sub>, (d) Ag<sub>2</sub>O-Ag/BiVO<sub>4</sub> (6h), and (e) Ag<sub>2</sub>O-Ag/BiVO<sub>4</sub> after use (photocatalytic degradation of MO).

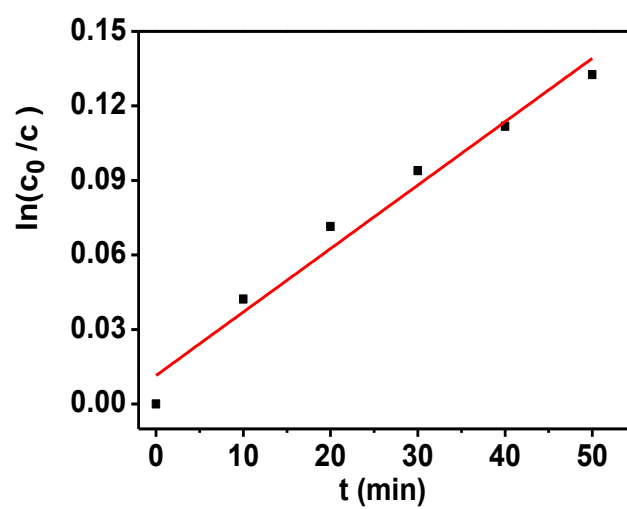

**Fig. S3.** The photocatalytic performance of Ag<sub>2</sub>O-Ag/BiVO<sub>4</sub> for degradation of phenol.

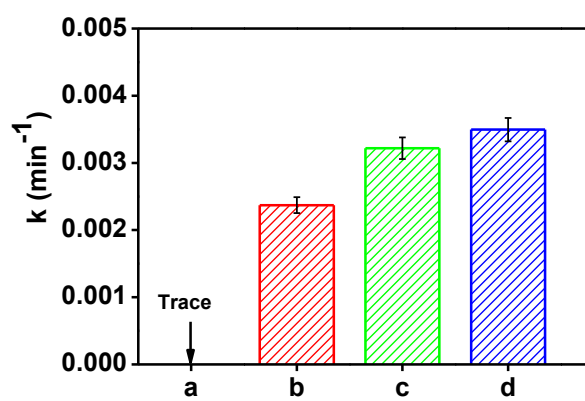

**Fig. S4.** The rate constant ( $k$ ) of MO decomposition by various photocatalysts: (a)

$\text{BiVO}_4$ , (b)  $\text{Cu(II)/BiVO}_4$ , (c)  $\text{Ag/BiVO}_4$ , (d)  $\text{Cu(II)-Ag/BiVO}_4$ .
